# Supplementary material
Source: PubMed Central journal article supplement (PMC6275354)
Supplement: zam024188898s1.pdf [file zam024188898s1.pdf]

**SUPPLEMENTARY MATERIAL for Dwulit-Smith *et al.***

**acl Actinobacteria Assemble a Functional Actinorhodopsin with Natively-Synthesized Retinal**

**TABLE S1** Metadata of *acl* genomes referred to in this study

| Classification | Genome Name             | IMG Taxon ID    | Recovered Genome |         |       | Completeness (%) <sup>i</sup> | Contamination (%) <sup>i</sup> |
|----------------|-------------------------|-----------------|------------------|---------|-------|-------------------------------|--------------------------------|
|                |                         |                 | Size (MB)        | Contigs | Genes |                               |                                |
| acl-A          | AAA024-D14 <sup>a</sup> | 2264265190      | 0.78             | 82      | 892   | 58.4                          | 0.98                           |
|                | AAA023-J06 <sup>a</sup> | 2236661001      | 0.70             | 98      | 818   | 43.7                          | 0.00                           |
|                | MMS-IA-53 <sup>b</sup>  | 2775506795      | 1.33             | 1       | 1386  | 100                           | 0.00                           |
|                | AAA028-I14 <sup>c</sup> | 2545555832      | 0.78             | 54      | 848   | 50.8                          | 0.00                           |
|                | AAA028-E20 <sup>c</sup> | 2602042079      | 0.88             | 51      | 953   | 60.2                          | 0.00                           |
|                | AAA278-O22 <sup>a</sup> | 2236661007      | 1.14             | 43      | 1238  | 78.2                          | 0.42                           |
| acl-B          | AAA028-A23 <sup>a</sup> | 2236661004      | 0.83             | 64      | 913   | 67.7                          | 0.19                           |
|                | AAA027-L06 <sup>d</sup> | 2505679121      | 1.16             | 75      | 1282  | 87.4                          | 4.37                           |
|                | MMS-21-122 <sup>b</sup> | 2775506799      | 1.24             | 1       | 1281  | 100                           | 0.00                           |
|                | AAA027-J17 <sup>a</sup> | 2236661002      | 0.97             | 81      | 1094  | 73.1                          | 0.84                           |
|                | AAA278-I18 <sup>a</sup> | 2236661006      | 0.94             | 54      | 1037  | 69.0                          | 0.17                           |
|                | AAA044-D11 <sup>c</sup> | 2524023189      | 1.15             | 30      | 1214  | 75.2                          | 0.84                           |
| acl-C          | IMCC26077 <sup>e</sup>  | 2602042021      | 1.52             | 1       | 1572  | 100.                          | 0.00                           |
|                | ME885 <sup>c</sup>      | 2582580608      | 0.87             | 78      | 906   | 55.7                          | 4.76                           |
|                | ME578 <sup>c</sup>      | 2556921504      | 0.36             | 32      | 390   | 25.9                          | 3.45                           |
|                | BIN_10 <sup>g</sup>     | NA <sup>h</sup> | 0.98             | 95      | 1171  | 75.7                          | 0.00                           |
|                | ME3864 <sup>c</sup>     | 2582580572      | 0.79             | 70      | 839   | 53.0                          | 3.78                           |

<sup>a</sup> Ghylin, T. W., Garcia, S. L., Moya, F., Oyserman, B. O., Schwientek, P., Forest, K. T., ... McMahon, K. D. (2014). Comparative single-cell genomics reveals potential ecological niches for the freshwater *acl* Actinobacteria lineage. *The ISME Journal*, 8(12), 2503–2516. These genomes are single-cell amplified genomes (SAGs) recovered from one of three lakes including Lake Mendota, using fluorescence activated cell sorting, subsequent multiple displacement amplification (MDA) followed by sequencing and assembly. Additional details are available in the original publication of Ghylin *et al* 2014.

<sup>b</sup> Neuenschwander S.M., Ghai R., Pernthaler J., Salcher M. M. (2018) Microdiversification in genome-streamlined ubiquitous freshwater Actinobacteria. *The ISME Journal*, 12(1), 185-198. This genome is a MAG derived a dilution culture enriched in *acl*-B cells. The DNA was obtained using MDA products that were sequenced as a metagenome, assembled, and binned manually with Sanger sequencing to close gaps. Additional details are available in the original publication of Neuenschwander *et al* 2018.

<sup>c</sup> Hamilton J. J., Garcia S. L., Brown B. S., Oyserman B. O., Moya-Flores F., Bertilsson S., Malmstrom R. R., Forest K. T., McMahon K. D. 2017. Metabolic network analysis and metatranscriptomics reveal auxotrophies and nutrient sources of the cosmopolitan freshwater microbial lineage *acl*. *mSystems* 2:e00091-17. Note that the names in the IMG record are actually MEint.metabat.885, MEint.metabat.578, and MEint.3864, respectively. Briefly, they are MAGs recovered from combined assemblies (i.e. bioinformatically pooled metagenomes from 94 samples collected from the top 12 m of Lake Mendota at the deep hole). MAGs were binned using differential coverage based on metagenomes mapped to the combined assembly, and based on k-mer frequencies. Methodological details can be found in Hamilton *et al* 2017 and S. Roux, L-K.Chan, R. Egan, R. R. Malmstrom, K. D. McMahon, M. B. Sullivan (2017) "Ecogenomics of freshwater virophages and their giant virus hosts assessed through time-series metagenomics". *Nature Communications*. 8: article 858.

<sup>d</sup> Garcia, S. L., McMahon, K. D., Martinez-Garcia, M., Srivastava, A., Sczyrba, A., Stepanauskas, R., ... Warnecke, F. (2013). Metabolic potential of a single cell belonging to one of the most abundant lineages in freshwater bacterioplankton. *The ISME Journal*, 7(1), 137–147. This genome was a SAG recovered from Lake Stechlin in Germany, using fluorescence activated cell sorting, subsequent multiple displacement amplification (MDA) followed by sequencing and assembly. Additional details are available in the original publication of Garcia *et al* 2013.

<sup>e</sup> Kang I., Kim S., Islam M. R., Cho J-C. (2017). The first complete genome sequences of the *acl* lineage, the most abundant freshwater Actinobacteria, obtained by whole-genome-amplification of dilution-to-extinction cultures. *Sci Rep* 7. This genome is a MAG derived from a dilution culture enriched in *acl*-C cells. The DNA was obtained using MDA products that were sequenced as a metagenome, assembled, and binned manually with Sanger sequencing to close gaps. Additional details are available in the original publication of Kang et al 2017.

<sup>g</sup> Tsementzi, D., Poretsky, R. S., Rodriguez-R, L. M., Luo, C., & Konstantinidis, K. T. (2014). Evaluation of metatranscriptomic protocols and application to the study of freshwater microbial communities. *Environmental Microbiology Reports*, 6(6), 640–655.

<sup>h</sup> Data are available at <http://enve-omics.ce.gatech.edu/data/MTR>

<sup>i</sup> Inferred using CheckM and the set of 204 Actinobacteria-specific marker genes, or set to 100% and 0% because genome is listed as complete in the original publication.

**SUPPLEMENTARY FIGURE LEGENDS**

**FIG S1** Xantho-opsin phylogeny groupings provide clear evidence for a distinct grouping of action-opsins. A conserved proline in  $\alpha 4$  differentiates actino-opsins (ActRs) from other xantho-opsins (XRs) in the supergroup. Bolded opsins are aligned in Fig. 1A.

**FIG S2** Alignments for lycopene cyclase chains (*acl*-CrtYc and *acl*-CrtYd). Proteins from *acl* genome AAA278-O22 are aligned to CrtYc (A) and CrtYd (B) from *Myxococcus xanthus* (Mx), which form the functionally characterized heterodimeric  $\beta$ -cyclase. In this and following five figures, identical (\*), highly similar (:), and slightly similar (.) residues are indicated, and transmembrane helix predictions are highlighted in gray. The catalytic PxE(E/D) motif is highlighted in orange.

**FIG S3** Alignment for 15-15'- $\beta$ -carotene dioxygenase (*acl*-Blh). The protein from *acl* genome AAA278-O22 is aligned to a functionally characterized 15-15'- $\beta$ -carotene dioxygenase from Uncultured Marine Bacterium 66A03 (Umb66A03). The histidines indicated for non-heme iron binding are highlighted in orange.

**FIG S4** Alignment for predicted spheroidene mono-oxygenase (*acl*-CrtA). The protein from *acl* genome AAA278-O22 is aligned to functionally characterized CrtA proteins from *Rhodobacter sphaeroides* (Rs) and Marine bacterium P99-3 (MbP99-3).

**FIG S5** Alignment for predicted  $\gamma$ -carotene 1'-hydroxylase (*acl*-CruF). The protein from *acl* genome AAA278-O22 is aligned to functionally characterized CruF proteins from *Deinococcus radiodurans* R1 (Dr) and *Deinococcus geothermalis* DSM11300 (Ds).

**FIG S6** Alignment for glycosyltransferase (*acl*-CruG). The protein from *acl* genome AAA278-O22 is aligned to functionally characterized CruG proteins from *Gemmatimonas aurantiaca* (Ga) and *Synechococcus* sp. PCC7002 (SP).

**FIG S7** Alignment for predicted  $\gamma$  carotene 3',4' desaturase (*acl*-CrtD). The protein from *acl* genome AAA278-O22 is aligned to functionally characterized CrtD proteins from Marine bacterium P99-3 (MbP99-3) and *Nonlabens dokdonensis* DSW-6 (Nd).

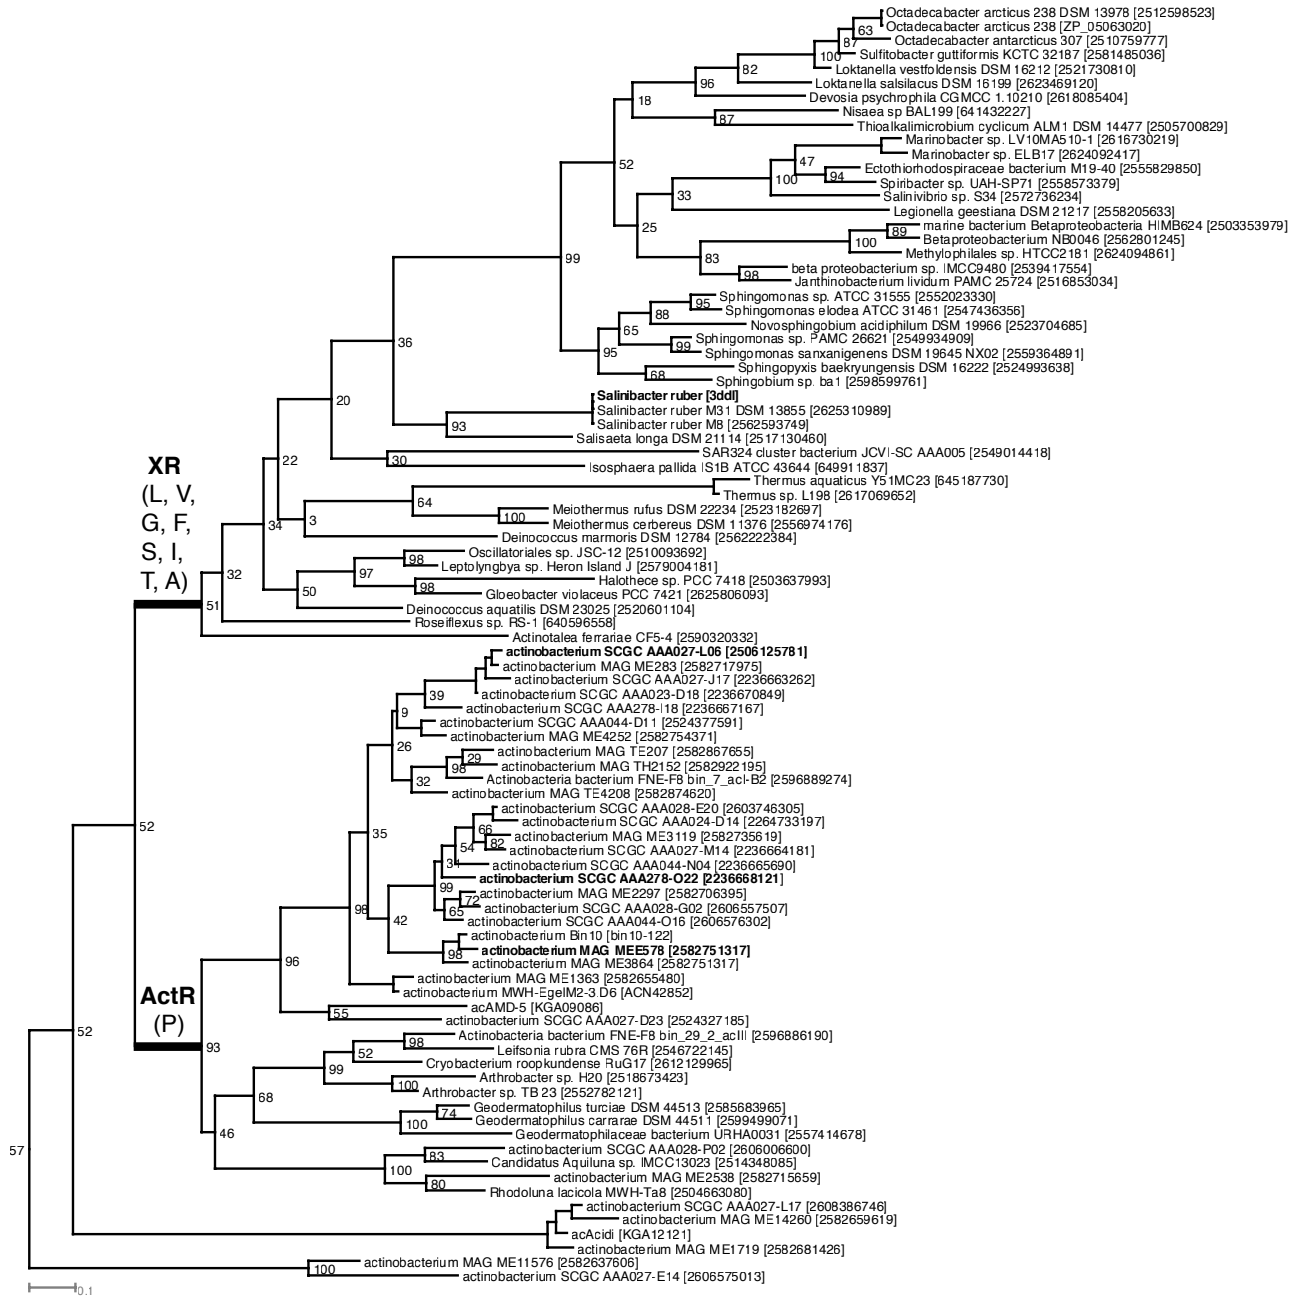

A

|            |                                                               |     |
|------------|---------------------------------------------------------------|-----|
| AAA278-O22 | -----MGMLIFT-LCGSGWLEIVLKTGVLRRRLKRAALSILPISIFFLIWDAYAIAKGHW  | 53  |
| Mx         | MTYARFLGLFVVVPIFLAWRYR--RTFTARSLAPMGLLLIVVYAATSPWDNLAVKWGLW   | 58  |
|            | :*:::.. : . * : * . * * . * :: : ** *: * *                    |     |
| AAA278-O22 | FFDRQOMLGIIGPFNI PLEEY LFFIVVPLAAILTIEG-----VTTVKPHWRKGEFG    | 104 |
| Mx         | GFDPERIWGIKLG-YL PLEEY LFFALQTLVGLWQAARLARALAPDAQASRPAAETGERR | 117 |
|            | ** ::: ** :***** : * . * :. . : : * ..**                      |     |
| AAA278-O22 | E-----                                                        | 105 |
| Mx         | EGALTAREVAP                                                   | 128 |
|            | *                                                             |     |

B

|            |                                                               |     |
|------------|---------------------------------------------------------------|-----|
| AAA278-O22 | -----MIYSDIAIAAFGISVMVDLFIFKNSMLTRAAFWTSYAIILPFQLLTNWW        | 49  |
| Mx         | MMETKWAYLIHLLGWTLPVIAFQLVVLVRHYKERSGAVLKA-----VLPPAFIMGLY     | 52  |
|            | :: : : ** : *:* : .. : :* : ** :: . :                         |     |
| AAA278-O22 | -----LTSRNIVMYNPDAIIGVRCSA PVEDLLFGF-ALVLSVMGMWEFWGRRGLQRH    | 101 |
| Mx         | LSIADHLAISTGIWNFGEGKHLGVYLGVP PLEEVVFFLITSVLVSLGLALFTGLVALLGE | 112 |
|            | * . * :. . :** : .***** : : ** :*: * * . * .                  |     |
| AAA278-O22 | ----                                                          | 101 |
| Mx         | ARAS                                                          | 116 |

|            |                                                                 |     |
|------------|-----------------------------------------------------------------|-----|
| Umb66A03   | -----MGLMLIDWCALE--LVVFIGLPHGALD                                | 25  |
| AAA278-O22 | MEMAKLKTF SRVRTFSSAIVAVAIALSIVFSSWLGVD SLNWQVVM AVVALAIGIPHGALD | 60  |
|            | :* ::* .: .: ** :*****                                          |     |
| Umb66A03   | AAISFSMISSAKRIARLAGILLIYLLLATAFFLIWYQ--LPAFSLIFLLISIIHFGMAD     | 83  |
| AAA278-O22 | HLVTLPKAQPLKM---AIFIAIY--VAIALIAIWAILQWNVWGFIAVVIMSATHFGIGD     | 114 |
|            | ::: . * * : * * : * * : * * . : : : : * * * * : *               |     |
| Umb66A03   | FNASPSKL-----KWP HIIAHGGVVT VWLPLIQKNEVTKLFSILTNGPTPILWDI       | 133 |
| AAA278-O22 | SAFISELNRLKGIQSHLPIWAYA-PAAGALPVVIPLVNSRSTDALQKV---NSELINWHH    | 170 |
|            | . * : . * : * : * * : * * : * * . * . * *                       |     |
| Umb66A03   | LLIFFL--CWSIGVCLHTYETLRSKHYNIAFELIGLIFLAWYAPPLVTFATYFCFIHSRR    | 191 |
| AAA278-O22 | GYTSELQI AVAVIATLSAMTLLSKKRYRDL LDVALLAALASVAPPLVAFVYFGCWHAMR   | 230 |
|            | * . : : . * : * . * : * : * * * * * * * * * * * * * * *         |     |
| Umb66A03   | HFSFVWKQLQHMSSKMMIGSA-----IILSCTSWLIGGGIYFFLNSKMI---ASEAAL      | 242 |
| AAA278-O22 | HTARLSSLLPRSLA-AYEAGNSWQAFRSAVIPGLPALIGTLIFVALLAGF SHNNVSDSFL   | 289 |
|            | * : : . * : : * : * : * * * * * * * * * * * * * * *             |     |
| Umb66A03   | QTVFIGLAALTVPHMILIDFIFRPHSSRIKIKN-----                          | 275 |
| AAA278-O22 | WLTIVTIWALTVPHMVTA KLDR-----AALKNKSHLR                          | 322 |
|            | . : : * * * * * * : : * * * * * * * * * * * * * * *             |     |







|            |                                                               |     |
|------------|---------------------------------------------------------------|-----|
| AAA278-O22 | -----MAQSLTSLIFIIISLINFVTIRIPK----RDEEIKKSVTVL                | 39  |
| Ga         | MIDAVPWSSLGVSF-LVGQAL---CLMVLVSRAPGRSRRPPVSPRLAPRDD-TTVSVI    | 55  |
| SP         | -MDFSPVWIGGLCLFGLLIQGS---GALVVLSRLMKGAVRRSPLTPQASNSDNLAAVTVV  | 56  |
|            | : * . : : : * * * : : * : * : *                               |     |
| AAA278-O22 | APMRNEAENVPEFISALSSQMGVKNLNFVIINDGSTDKTAELLTSVIDGDPREFSFIDSPI | 99  |
| Ga         | VATLNEAHRIGPCLDGLLQQ-PAPLLEVLVVDSSRSRDGTPELVQTYADRDPRIRLITDDP | 114 |
| SP         | VPSLNEVERIQPCLDGLSQQ-SYEVREILVVDNSNSTDGTREKVLAKAATDPRFRLLTDDP | 115 |
|            | . ** . . . : : . * . * : : : : . * * * * : : * * : : .        |     |
| AAA278-O22 | QRDGLWLGKVSALQSGYES--ARSEFIITLDADVRLQPNAIMRAISQLERLKLDFVSPYPR | 157 |
| Ga         | LPPGVWVKVWALQTGLQA--ARGAWVLGIDADTVPAAGLVGGVIDAAERDRFDVVSFSR   | 172 |
| SP         | LPQGWVGRPWALNWGFHSSPDSEWILGVDADTQPQRGMIAVSVLQAAEEEGFDLVSLSPQ  | 175 |
|            | ** : * : * : * : : : * * * . : : . * . : * . * * * :          |     |
| AAA278-O22 | QIAQTFAEKLIQPLLHWSWMSTVILRLAEKFPRRSTAVANGQFFVARKNALDAINGFESV  | 217 |
| Ga         | FAGQTAAERLVQPAMLVTLVYRTG-AAGAEQ-QPDRVLANGQCFLARRAVLEQHGGYAVA  | 230 |
| SP         | FILRSPGEWWLQPALLMTLLFRFD-VAGIRQPDQDSVMANGQCFLCRRKVLNVGGYRSA   | 234 |
|            | : : . * : * * : : : . . . : * * * * * : * : * : * : .         |     |
| AAA278-O22 | STQILDDIELARSLISAGYRGVVTEGSGIASTRMYSSFDEIRQGYGKSLWKAFGGSIGT-  | 276 |
| Ga         | RGSFSDDVTLARHLAMHGARVGFLDGSRIIEVRAYATLREMREWGRSFDLKDSASRVQG   | 290 |
| SP         | AGSFCDDVTLARNIAKAGYRVGFLDGAKIIKVRMYEGMRETWDEWGRSLDLKDATSRTEL  | 294 |
|            | . : * * : * * : * * . : * : * . * * : * : * * : * . *         |     |
| AAA278-O22 | VIAIAFLFATGILPVLMI LN-----GYLIGWLIYLYIV-FSR--EISA             | 316 |
| Ga         | WLDVVLVWLQALPLPVLLGGVLLWFGAPAALSPYPQWLLVALIATNSFAVLLRILMLWV   | 350 |
| SP         | WGQLWLLTMVQGLPIPLTM---LLFGGIEEGLS---NPFLSGWLDLNVFLLLVRFGMLLA  | 348 |
|            | : : : . * * : : : * . : : : * : .                             |     |
| AAA278-O22 | IRS-----RSNPLFAFLHPLSSALLIYLIISWRNRGTIQWKGRTV-----            | 357 |
| Ga         | LRTSYHE---RGVTYWLSWLSD---AAAARLMTS-MARTPRSWRGRRYASERAPV       | 399 |
| SP         | ISGSYDRQFSVGKSAWLFWLSPFADPFAVARIFLS-ARQKPKAWRGRVYS-----       | 397 |
|            | : : : . : : * : : * : : * : * *                               |     |

|            |                                                                       |     |
|------------|-----------------------------------------------------------------------|-----|
| AAA278-O22 | MTGQVGKVKNPEKIAVIGAGIGGLCTAARLAKAGHSVTIFEASSRTGGKCRTEWIGRYAF          | 60  |
| MbP99-3    | -----MKKAIIGSGIAGLAAALRLKKKGYSVFEKNDYAGGKLHAIELGGYRF                  | 50  |
| Nd         | -----MKNIAIVIGAGIGGLAAALRLRHQGYSVTIFEKNDYAGGKLHAIKDG YRF              | 50  |
|            | :: : ** : ** : * ** : * : ** : ** .. : ** : : . * *                   |     |
| AAA278-O22 | DTGPSLLTLPVYRDFQRTGDMGRVLELEEVPNSFDYRFHDGTSVKFANLSRKQTLAS             | 120 |
| MbP99-3    | DLGPSLFTLPHLIDELHQLFPDVEID-FNYIKKKTACHYFWEDGTSFEAPADLENFAVKA          | 109 |
| Nd         | DLGPSLFTLPHLVENLFALFPEEIID-FGYKSKAISFHYFWDDGTLFKASTDSSQFIEDA          | 109 |
|            | * ** : ** : : : : : : : * : ** : : : : :                              |     |
| AAA278-O22 | IEQTLGAAAASEWNRVMLRAEAMWDVSREPFIESELKSPLSLLKRPRLIRDLKIISPWK-          | 179 |
| MbP99-3    | --AEIFDEKQNTLSKYLQNSKMYESTKSLFLEKSLHKSNTYFSKQTLKAI--LKIPFLG           | 165 |
| Nd         | --SKVFKEEKSTIKKYLAKSKSKYELTKSLFLEKSLHKATTYFSLDTPVKAI--VHAPFLG         | 165 |
|            | : . . : : : : : : * : * . * . : : : : : : * :                         |     |
| AAA278-O22 | -----SLREIGITNPYLAKIMDRYATYSGSDPRYAPAVLSTIAFVEEAFGAWHIKGGIGT          | 234 |
| MbP99-3    | INNTLDQENKFKSNPKLNQLFNRYATYNGSSPYLTPGIMSMIPYLELGLGTYYPQGGMHR          | 225 |
| Nd         | LNNTLNDENSKFKNPKLQLFNRYATYNGSSPYQTPGIMTMIPHLELGLGTYYPDGGMHR           | 225 |
|            | . . : : ** * : : : * * * . * * : * : : : * . * : * : : : . ** :       |     |
| AAA278-O22 | LAEKITERCEKLGVDIRLNSRVNEIVLNKSRVTGVVNDATLTFARVVANADAQFVYEKL           | 294 |
| MbP99-3    | ISQSLFELAQKVGVEFRFRKNVKKINHSNNKVTGVTEKGTHTDADIVLCNMDVFPYRQL           | 285 |
| Nd         | ISQSLFELAQKVGKFRFRESVNIITTSKNKVTGVETKNGSYLSDLVVSNDIVPTYRNL            | 285 |
|            | : : : : * . : * : * . : * . . * . : * : * * . . . : * : * * . * . : * |     |
| AAA278-O22 | LAPTKKVVNIRKKLAKQEPSLAGFSLLLGLKPSDSQPLEHHTILFPENYDLEFESIFTKR          | 354 |
| MbP99-3    | LQDIK----APEKTLKQERSSSALIFYWGIKKS-FPQLDLHNILFSENYKAEFEAIFNNK          | 340 |
| Nd         | MKDVP----APEKTLKQERSSSALIFYWGIDRE-FPELDLHNILFSENYKTEFEHIFEHK          | 340 |
|            | : : : * . * * : : : * : . . * : * . * * * * : * . * * * * : :         |     |
| AAA278-O22 | TPVEKPTIYICAPRD-PLMVKDKDHESWFVLVNA PRHSTSGNGFDWSNQDFNRQYANSII         | 413 |
| MbP99-3    | SLYEDPTVYINITSKQSPQDAPKGCENWFVMINTPGD----YGQNWENLVIKA--KKNIL          | 394 |
| Nd         | TLAQDPTVYINITSKESSNDAPAGHENWFVMINAPGD----YGQDWEQLVEES--KKQII          | 394 |
|            | : : * : * * . . * . * * : * : * . * : * . : : * :                     |     |
| AAA278-O22 | NQI-ETAGISIRERLEVLEIRTPLDLQESVNAPGGSIIYGTSSNGARSAFARAKN-RSPIK         | 471 |
| MbP99-3    | SKIKRCLNIDVEELIDVEYVLTPOGIEKNTSSYRGALYGAASNKFAAFLRHPNFNKTIG           | 454 |
| Nd         | AKIKKCLHVDISKHITTEYILTPOGIEKNTSSYRGALYGAASNKFAAFLRHPNFNGKIK           | 454 |
|            | : * . : : : : . : * * : : : : : * : * : * : * . : * * * * . *         |     |
| AAA278-O22 | GLYLVGGSAAHPGGGLPLVGLSAEMVAKAILE---                                   | 502 |
| MbP99-3    | NLYHVGGSVHPGGGIPLCLLSAKITADLIPNTNA                                    | 488 |
| Nd         | NLYHVGGSVHPGGGIPLCLLSAQITADLIQKEQ-                                    | 487 |
|            | . ** * * * . * * * * : * * * * : . * . * :                            |     |
